## 12 **Abstract**

13 Neuromedin U receptors (NMURs), including NMUR1 and NMUR2, are a group of G<sub>q/11</sub>-coupled  
14 G protein-coupled receptors (GPCRs) related to pleiotropic physiological functions. Upon  
15 stimulation by two endogenous neuropeptides, neuromedin U and S (NMU and NMS) with similar  
16 binding affinities, NMUR1 and NMUR2 primarily display distinct peripheral tissue and central  
17 nervous system (CNS) functions, respectively, due to their distinct tissue distributions. These NMU  
18 receptors have triggered extensive attention as drug targets for obesity and immune inflammation.  
19 Specifically, selective agonists for NMUR1 in peripheral tissue show promising long-term anti-  
20 obesity effects with fewer CNS-related side effects. However, the mechanisms of peptide binding  
21 specificity and receptor activation remain elusive due to the lack of NMU receptor structures, which  
22 hamper drug design targeting NMU receptors. Here, we report four cryo-electron microscopy  
23 structures of G<sub>q</sub> chimera-coupled NMUR1 and NMUR2 bound with NMU and NMS. These  
24 structures present the conserved overall peptide-binding mode and reveal the mechanism of peptide  
25 selectivity for specific NMURs, as well as the common activation mechanism of the NMUR  
26 subfamily. Together, these findings provide insights into the molecular basis of the peptide  
27 recognition selectivity and offer a new opportunity for designing selective drugs targeting NMURs.

28

## 29 **Introduction**

30 Human neuromedin U (NMU) is a 25-amino-acid endogenous peptide that was first discovered in  
31 extracts of the porcine spinal cord with a potent smooth muscle contractile activity <sup>1</sup>. It is also  
32 involved in pleiotropic physiological functions, including the regulation of blood pressure, food  
33 uptake, nociception, pain perception, bone formation, and immunological responses <sup>2</sup>. More recently,  
34 human neuromedin S (NMS), a 33-amino-acids endogenous peptide, was discovered, which shares  
35 an identical C-terminal heptapeptide with NMU. Unlike NMU, which is widely distributed in the  
36 central nervous system (CNS) and peripheral tissues, NMS mainly exists in the suprachiasmatic  
37 nucleus in the CNS and primarily regulates biological rhythms <sup>3,4</sup>. Both peptides stimulate two  
38 different class A G protein-coupling receptors (GPCRs), neuromedin U receptor 1 (NMUR1) and  
39 neuromedin U receptor 2 (NMUR2), with sub-nanomolar affinity but low selectivity <sup>5,6,7</sup>.

40

41 Upon stimulation by NMU and NMS, both NMUR1 and NMUR2 predominantly activate G<sub>q/11</sub> with  
42 some evidence of G<sub>i</sub> coupling <sup>8</sup>. The biological functions of the two NMUR subtypes differ by their  
43 distinct tissue distributions. NMUR1 is predominantly expressed in peripheral tissues, while  
44 NMUR2 is widely distributed in the CNS, most abundantly in the cerebral cortex and hypothalamus  
45 <sup>9</sup>. Both receptor subtypes are closely related to the regulation of food intake and energy balance.  
46 Peripheral and central administration of NMU reduced food intake and weight gain by stimulating  
47 NMUR1 and NMUR2, respectively <sup>10-12</sup>. Compared with the NMUR1-selective agonist, the  
48 NMUR2 selective agonist has a more potent body weight-lost effect and cause less diarrhea, making  
49 it a more well-balanced drug for the treatment of obesity <sup>13</sup>. Thus, development of selective agonists

50 will benefit from the identification of the mechanisms through which the receptors interact with the  
51 peptide ligands.

52

53 Extensive efforts have been devoted to understanding the peptide-binding mechanisms of NMUR  
54 subtypes. Both NMU and NMS share the highly conserved C-terminal heptapeptide (FLFRPRN-  
55 NH<sub>2</sub>) and the amidated asparagine at the C-terminus across different species<sup>9,14,15</sup>, indicative of the  
56 importance of this conserved peptide segment for receptor recognition. Indeed, this heptapeptide is  
57 strongly related to the binding activity, with even single amino acid substitutions reducing their  
58 biological effects<sup>16-18</sup>. Furthermore, the amidated asparagine is also critical for the activity of  
59 peptides<sup>9</sup>. Based on this conserved heptapeptide, a series of NMU analogs have been designed,  
60 aiming to develop NMUR1/2 selective agonists. These findings have provided clues for  
61 understanding receptor subtype selectivity and designing drug candidates for anti-obesity therapy  
62<sup>18-25</sup>. Although considerable efforts have been made, the mechanism of peptide recognition by  
63 receptors remains to be fully clarified due to the lack of NMUR structures, which has hindered the  
64 development of receptor-selective agonists. Here, using single-particle cryo-electron microscopy  
65 (cryo-EM), we report four structures of G<sub>q</sub> chimera-coupled NMUR1 and NMUR2 bound to either  
66 NMU or NMS. These structures provide comprehensive insights into the peptide-binding mode and  
67 reveal determinants for recognition selectivity of NMUR subtypes by peptides and offer new  
68 opportunities for the rational design of selective pharmaceuticals targeting specific NMU receptor  
69 subtypes.

70

## 71 **Results**

### 72 **Overall structures of NMUR1/2 signaling complexes**

73 To facilitate the expression of NMUR1/2 complexes, we introduced a BRIL tag to the N-termini of  
74 the wild-type (WT) full-length receptor<sup>26-28</sup>. The NMUR1-G<sub>q</sub> chimera complex was stabilized by  
75 the NanoBiT strategy<sup>29</sup>. These modifications have little effect on the pharmacological properties of  
76 the NMURs (Supplementary Fig. 1). The G $\alpha_q$  chimera was generated based on the mini-G $\alpha_s$  scaffold  
77 with an N-terminus replacement of corresponding sequences of G $\alpha_{i1}$  to facilitate the binding of  
78 scFv16<sup>30,31,32</sup>, designated as mG $\alpha_{s/q/iN}$ . Unless otherwise stated, G<sub>q</sub> refers to the mG $\alpha_{s/q/iN}$ , which was  
79 used for structural studies. Incubation of NMU/NMS with membranes from cells co-expressing  
80 receptors and heterotrimer G<sub>q</sub> proteins in the presence of scFv16<sup>33-38</sup> enables effective assembly of  
81 NMU/NMS-NMURs-G<sub>q</sub> complexes, which produces high homogenous complex samples for  
82 structural studies.

83

84 The structures of the NMU-NMUR1-G<sub>q</sub>-scFv16 and NMS-NMUR1-G<sub>q</sub>-scFv16 complexes were  
85 determined by single-particle cryo-EM to the resolutions of 3.2 Å and 2.9 Å, respectively (Fig. 1c,  
86 d, Supplementary Fig. 2, and Supplementary Table 1). The cryo-EM structures of NMUR2-G<sub>q</sub>-  
87 scFv16 complexes bound to NMU and NMS were determined at 2.8 Å and 3.2 Å, respectively (Fig.

88 1e, f and Supplementary Fig. 3). The ligand, receptor, and the  $\alpha 5$  helix of the  $G\alpha_q$  subunit in the four  
89 complexes are clearly visible in the EM maps (Supplementary Fig. 4), and side chains of the  
90 majority of amino acid residues are well-defined in all components. Hence, these structures provide  
91 detailed information on the binding interface between peptides and NMUR1/2, as well as the  
92 coupling interface between receptors and  $G_q$  heterotrimer.

93

94 The overall conformations of the four active NMUR1/2- $G_q$  complexes are highly similar (Fig. 1c-f  
95 and Supplementary Fig. 5a), with root mean square deviation (R.M.S.D.) values of 0.371-0.735 Å  
96 for the entire complexes and 0.467-0.794 Å for the receptor. Unlike most GPCRs with a solved  
97 structure, the EM density of extracellular loop 2 (ECL2) from both receptors is oriented almost  
98 parallel to the transmembrane domains (TMDs). Interestingly, ambiguous EM densities of the N-  
99 termini of peptides can be observed in these four complexes. These N-termini of the peptides seem  
100 to interact with the ECL2s, consistent with the previous report that ECL2 is involved in peptide-  
101 induced receptor activation (Supplementary Fig. 5b)<sup>39,40</sup>. In addition, the binding poses of NMU  
102 and NMS in both receptors are highly overlaid (R.M.S.D. of 0.749 Å for NMUR1 and 0.527 Å for  
103 NMUR2). Although occupying the same TM cavity for all peptide GPCR structures determined to  
104 date<sup>41,42,43</sup>, NMU and NMS adopt different binding poses, demonstrating the diverse recognition  
105 modes of peptides (Fig. 2a-f and Supplementary Fig. 5c).

106

### 107 **Binding modes of NMU and NMS for NMURs**

108 NMU and NMS in the four NMURs complex structures adopt similar conformations. C-termini of  
109 both peptides insert into an overlapped orthosteric binding pocket, comprising all TM helices and  
110 ECLs (Fig. 2a-f, Supplementary Figs. 6 and 7). Due to the sequence consensus of the C-terminal  
111 heptapeptide, both NMU and NMS share highly conserved binding modes for specific NMUR  
112 subtypes. We use the structure of the NMU-NMUR2- $G_q$  complex, which shows a higher resolution  
113 relative to the NMS-bound one, to analyze the peptide binding mode for NMUR2.

114

115 At the bottom region of the orthosteric peptide-binding pocket, polar receptor residues form an  
116 extensive polar interaction network with  $R^{6U}$  and amidated  $N^{7U}$  (Fig. 2g). The amidation group of  
117  $N^{7U}$  makes a polar contact with  $E127^{3,33}$ , structurally supporting the fact that this amidation  
118 modification is necessary for the activity of NMU<sup>44</sup>. The side chain of  $N^{7U}$  forms H-bond  
119 interactions with  $N181^{4,60}$ ,  $Y213^{5,35}$ , and  $R288^{6,55}$ . Noteworthily, a conserved salt bridge between  
120  $E127^{3,33}$  and  $R288^{6,55}$  exists in NMURs and other GPCRs with relatively high homology, including  
121 ghrelin and neurotensin receptors (Supplementary Fig. 5d). This conserved salt bridge may closely  
122 pack TM3 and TM6, thereby preventing peptides from further insertion and stabilizing the active  
123 receptor conformation. On the opposite orientation of  $N^{7U}$ ,  $R^{6U}$  was fastened mainly through polar  
124 interactions by  $S312^{7,38}$  and  $E102^{2,61}$ , the latter further making intramolecular polar contacts with  
125  $Y52^{1,39}$  and  $Y317^{7,43}$ . These extensive polar interaction networks mediated by  $R^{6U}$  and amidated  $N^{7U}$

126 make substantial contributions to NMU activity, which is supported by the alanine mutagenesis  
127 analysis (Fig. 2g, Supplementary Figs. 8 and 9, Supplementary Table 2). Another polar network  
128 links R<sup>4U</sup> to E105<sup>2.64</sup>, N109<sup>ECL1</sup>, and K122<sup>3.28</sup>, locking NMU with TM2, TM3, and ECL1 (Fig. 2h).  
129 Apart from the polar interaction networks, F<sup>1U</sup>, L<sup>2U</sup>, and F<sup>3U</sup> are engaged in hydrophobic contacts  
130 with the upper part of the TMD pocket. F<sup>1U</sup> and F<sup>3U</sup> form intramolecular  $\pi$ -stacking and  
131 hydrophobically interact with the F44<sup>1.31</sup>, M106<sup>2.65</sup>, Y110<sup>ECL1</sup>, and V310<sup>7.36</sup> (Fig. 2i). L<sup>2U</sup> faces an  
132 environment composed of F291<sup>6.58</sup>, W297<sup>ECL3</sup>, A302<sup>7.28</sup>, and F305<sup>7.31</sup>. F291<sup>6.58</sup> and F305<sup>7.31</sup> are also  
133 involved in the hydrophobic interactions with P<sup>4U</sup>, extending the L<sup>2U</sup>-mediated hydrophobic  
134 interaction network (Fig. 2h, i). Most of these hydrophobic residues are involved in NMU-induced  
135 NMUR2 activation. It should be noted that the hampered peptide activities on Y110<sup>ECL1</sup>A and  
136 K122<sup>3.28</sup>A mutants are probably be attributed to the decreased expression level (Supplementary Figs.  
137 8 and 9, Supplementary Table 2). The C-terminal heptapeptide and the amidated asparagine of NMS  
138 (F<sup>1S</sup>-N<sup>7S</sup>-NH<sub>2</sub>) share a highly similar binding mode with NMU for NMUR2 (Fig. 2g-i). This  
139 conserved peptide-binding pattern is also observed in NMUR1 (Supplementary Fig. 6).

140

141 Noteworthy, cognate residues for both NMUR1 and NMUR2 surrounding P<sup>5U/S</sup>-N<sup>7U/S</sup>, the three  
142 amino acids at the end of the peptides, are completely conserved, thus making highly similar  
143 interactions with the C-termini of peptides. In contrast, the peptide segment F<sup>1U/S</sup>-R<sup>4U/S</sup> of both  
144 peptides face distinct physicochemical environments and differ in the interaction pattern for the two  
145 NMUR subtypes (Fig. 3 and Supplementary Figs. 6). This distinction of the F<sup>1U/S</sup>-R<sup>4U/S</sup> binding  
146 environment may provide a basis for discriminating selective agonists by specific NMUR subtypes,  
147 thus probably offering an opportunity for designing NMUR subtype-selective ligands.

148

#### 149 **Molecular basis of peptide selectivity for NMURs**

150 Hexapeptide analogs of NMU with amino acid substitution at L<sup>2U</sup>-F<sup>3U</sup>-R<sup>4U</sup> have shown potential  
151 selectivity for specific NMUR subtypes<sup>18,19,21,22</sup>. Pairwise structures of NMURs in complex with  
152 NMU offer a template for understanding the selective recognition basis of these NMU analogs.

153

154 For NMUR2, R<sup>4U</sup> lies in a more potent polar environment (E105<sup>2.64</sup>, N109<sup>ECL1</sup>, T203<sup>ECL2</sup>, and  
155 T205<sup>ECL2</sup>) than NMUR1 (E120<sup>2.64</sup>). Moreover, the side chain of R<sup>4U</sup> in NMUR1 is less stretched due  
156 to the steric hindrance caused by ambient residues (Fig. 3a, b). Replacing the side chain of R<sup>4U</sup> with  
157 the aminoalkyl group with a comparable or shorter carbon chain decreased their activity to NMUR1  
158<sup>18</sup>. However, interactions between these substituted side chains and residues in NMUR2 are more  
159 easily maintained, providing the NMUR2 binding preference of these NMU analogs. Similarly,  
160 guanidine derivatives with shorter carbon chains also displayed higher selectivity for NMUR2 over  
161 NMUR1<sup>18,25</sup>. According to the molecular docking results, the guanidinium group may polarly  
162 interact with T203<sup>ECL2</sup> and T205<sup>ECL2</sup> in NMUR2 but fail to engage with cognate hydrophobic  
163 residues in NMUR1 (V218<sup>ECL2</sup> and C219<sup>ECL2</sup>) (Supplementary Fig. 10a-c). On the contrary,

164 guanidine and aminoalkyl derivatives with comparable or longer carbon chains relative to arginine  
165 showed non-selectivity or slightly increased selectivity to NMUR1<sup>18</sup>.

166

167 In contrast to NMUR2, a more extensive hydrophobic network surrounding F<sup>3U</sup> in NMUR1 (L59<sup>1,31</sup>,  
168 F334<sup>7,31</sup>, H338<sup>7,35</sup>, and V339<sup>7,36</sup>) probably makes a greater contribution to stabilizing peptide-  
169 NMUR1 interaction, thus raising a hypothesis that this hydrophobic network may discriminate  
170 peptide derivatives with different receptor selectivity (Fig. 3c, d). This hypothesis is supported by  
171 the fact that substituting the aromatic phenyl ring of F<sup>3U</sup> by an aliphatic cyclohexyl ring or other  
172 alkyl side chains with weaker hydrophobicity increased their binding preference for NMUR2<sup>18,19</sup>.  
173 An isopropyl and cyclohexyl substitution of the F<sup>3U</sup> side chain may maintain hydrophobic  
174 interactions with M106<sup>2,65</sup> and V310<sup>7,36</sup> in NMUR2, which are absent in NMUR1 (Supplementary  
175 Fig. 10d, e). Conversely, displacing the side chain of F<sup>3U</sup> with a biphenyl, naphthyl, or indolyl group  
176 enhanced the binding selectivity for NMUR1 by forming hydrophobic interactions with L59<sup>1,31</sup>,  
177 F334<sup>7,31</sup>, and H338<sup>7,35</sup><sup>19,21</sup>, thus probably maintaining or even enhancing its interaction with  
178 NMUR1. In contrast, steric hindrance may occur between bulky side-chain substitution and residues  
179 in NMUR2, limiting its binding to NMUR2 (Supplementary Fig. 10f-h).

180

181 For NMUR2, L<sup>2U</sup> was buried in a compact residue environment (F291<sup>6,58</sup>, W297<sup>ECL3</sup>, A302<sup>7,28</sup>, and  
182 F305<sup>7,31</sup>), meaning that it is unable to accommodate bulky side-chains. Conversely, a wider space  
183 surrounding L<sup>2</sup> in the NMUR1 pocket may serve as a determinant for designing NMUR1-selective  
184 agonists (Fig. 3e-f). Indeed, the heteroaromatic ring and bulky aromatic ring substitution of the L<sup>2U</sup>  
185 side-chain are crucial to developing an NMUR1-selective agonist<sup>18,21,23</sup>. Our molecular docking  
186 analysis reveals that a biphenyl, naphthyl, or indolyl substitution of L<sup>2U</sup> side-chain sits closer to  
187 H331<sup>7,28</sup> and may create extra interactions with NMUR1 relative to NMUR2 (Supplementary Fig.  
188 10i-k). It should be noted that although the connectivity of our structural observation and the  
189 previous functional evidence on peptide selectivity, we cannot completely exclude the possible  
190 impact of the NanoBiT, which is introduced in the structure determination of NMUR1 complexes.  
191 Together, combined with previous functional findings, our structures enhance our understanding on  
192 the basis of NMUR subtype selectivity and offer a template for designing agonists targeting specific  
193 NMUR subtypes.

194

### 195 **Activation mechanism of NMURs**

196 Since the complexes of NMUR1 and NMUR2 with NMU or NMS share highly overlaid overall  
197 conformations, we applied the structure of the NMU-NMUR2-G<sub>q</sub> complex to consider the activation  
198 mechanisms of NMURs. Structural comparison of this complex with the antagonist-bound ghrelin  
199 receptor supports the contention that these NMURs are in the active state, featured by the  
200 pronounced outward displacement of the cytoplasmic end of TM6 and concomitantly inward shift  
201 of TM7 (Fig. 4a).

202

203 Due to the steric hindrance caused by a hydrophobic lock comprising of F284<sup>6,51</sup>, F126<sup>3,32</sup>, and  
204 Y317<sup>7,43</sup>, NMU is not able to directly contact the “toggle switch” residue W281<sup>6,48</sup>, which often  
205 undergoes a movement upon ligand binding<sup>45,46</sup> (Fig. 4b). Alternatively, the side chain of the  
206 amidated N<sup>7U</sup> in NMU may push the side chain of R288<sup>6,55</sup>, causing it to swing away from the  
207 receptor helical core (Fig. 4c). Concomitantly, the swing of R288<sup>6,55</sup> may lead to the conformational  
208 changes of F284<sup>6,51</sup> and W281<sup>6,48</sup>, further leading to the swing of F277<sup>6,44</sup> and the pronounced  
209 outward displacement of the cytoplasmic end of TM6 (Fig. 4d). The other conserved residues in  
210 “micro-switches” (ERY, PIF, and NPxxY) also undergo active-like conformational changes relative  
211 to the antagonist-bound ghrelin receptor and transmit the peptidic agonism signaling to the  
212 cytoplasmic face of the receptor to facilitate G protein coupling (Fig. 4e-g). Also, rotameric switches  
213 were caused by the conformational changes of F284<sup>6,51</sup> and W281<sup>6,48</sup>. The repacking of the inter-  
214 helical hydrophobic contacts between TM6 and TM7 occurred that led to the inward shift of the  
215 cytoplasmic end of TM7 (Fig. 4a). The R<sup>6,55</sup>-mediated activation mechanism shared by NMUR1 is  
216 also captured in the ghrelin receptor<sup>31</sup> and neurotensin receptor 1<sup>47</sup>, probably serving as a common  
217 mechanism across other peptide GPCRs with high sequence homology with NMURs, including the  
218 motilin receptor and neurotensin receptor 2 (Supplementary Fig. 5d).

219

## 220 **The interface between NMURs and the G $\alpha_q$ subunit**

221 The structure of the NMU-NMUR2-G<sub>q</sub> complex was applied to characterize the interface between  
222 NMURs and G<sub>q</sub> heterotrimer in the detergent micellar environment. Like other G protein-coupled  
223 GPCRs, the primary NMUR2-G $\alpha_q$  subunit interface is comprised of the C-terminal helix ( $\alpha_5$  helix)  
224 of G $\alpha_q$  and the cytoplasmic cavity of the TMD core (Fig. 5a). Structural comparisons of NMUR2-  
225 G<sub>q</sub> with G<sub>q</sub>-coupled cholecystokinin A receptor (CCK<sub>A</sub>R, PDB 7EZM<sup>48</sup>), histamine H1 receptor  
226 (H<sub>1</sub>R, PDB 7DFL<sup>49</sup>), and G<sub>11</sub>-coupled muscarinic acetylcholine receptor M1 (M<sub>1</sub>R, PDB 6OIJ<sup>50</sup>)  
227 complexes reveal distinct NMURs-G<sub>q</sub> coupling features. The NMU-NMUR2-G<sub>q</sub> complex displays  
228 a similar overall conformation with the CCK<sub>A</sub>R-G<sub>q</sub> complex but differs in conformations of TM6  
229 and the G $\alpha$  subunit relative to M<sub>1</sub>R-G<sub>11</sub> and H<sub>1</sub>R-G<sub>q</sub> complexes. Compared with G<sub>q/11</sub>-coupled M<sub>1</sub>R  
230 and H<sub>1</sub>R, the TM6 of NMUR2 undergoes a remarkably inward displacement (Fig. 5a). Consequently,  
231 the extreme C-terminal  $\alpha_5$  helix of G $\alpha_q$  subunit in NMUR2-G<sub>q</sub> complex shifts inward toward TM2,  
232 TM3, and ICL2 to avoid clashes with TM6, accompanied with the rotation of the entire G $\alpha_q$  subunit  
233 (Fig. 5a, b). Specifically, in contrast to Y356<sup>H5,23</sup> (measured at Ca atom of L<sup>H5,25</sup>, superscript refers  
234 to CGN system<sup>51</sup>) in the M<sub>1</sub>R-G<sub>11</sub> complex, the hydroxyl of Y358<sup>H5,23</sup> shift ~4 Å to create additional  
235 interactions with TM2 and ICL2 (T80<sup>2,39</sup> and S158<sup>ICL2</sup>) of NMUR2. Similar interactions were  
236 observed between Y356<sup>H5,23</sup> and T76<sup>2,39</sup> and Q153<sup>ICL2</sup> of CCK<sub>A</sub>R (Fig. 5b, c). On the contrary, Y356  
237 <sup>H5,23</sup> is anchored by polar interactions with S126/S128<sup>3,53</sup> and R137/R139<sup>ICL2</sup> in M<sub>1</sub>R/H<sub>1</sub>R (Fig. 5d).  
238 Together, these findings reveal the specific nature of the NMURs-G<sub>q</sub> interface. These NMURs-G<sub>q</sub>

239 complex structures are added to the pool for enhancing the understanding of the GPCR-G<sub>q</sub> coupling  
240 mechanism.

241

## 242 **Discussion**

243 In this paper, we reported four cryo-EM structures of G<sub>q</sub>-coupled NMUR1 and NMUR2 bound to  
244 either NMU or NMS. These structures present a conserved orthosteric peptide-binding pocket in  
245 both NMUR subtypes, which accommodate the identical heptapeptide at the C-termini of NMU and  
246 NMS. Combining structural observation and alanine mutagenesis analysis reveals the binding mode  
247 of the C-terminal heptapeptide, which is critical for the activity of both peptides. Intriguingly, we  
248 observed an ambiguous EM density in proximity to ECL2 in the map of our complexes except for  
249 the NMU-NMUR1-G<sub>q</sub> complex, which is derived from the N-terminus of NMU and NMS with high  
250 probability. This observation indicates a direct contact between the N-terminal segment of peptides  
251 and ECL2, consistent with the previous report that the N-termini of peptides made a substantial  
252 contribution to its binding activity to NMURs<sup>6,39,40,52</sup>. Moreover, pairwise structural comparison of  
253 NMUR1 and NMUR2 reveals potential determinants for receptor subtype selectivity. Additionally,  
254 a mechanism of R<sup>6,55</sup>-triggered receptor activation was found, which is conserved by the ghrelin  
255 receptor and neurotensin receptor 1<sup>31,47</sup>.

256

257 These structures provide a template for understanding the mechanism underlying peptide  
258 recognition selectivity for NMURs and offer an opportunity for designing receptor-selective ligands  
259 (Supplementary Fig. 11). The extreme C-terminal tripeptide with amidated modification (P<sup>5</sup>-R<sup>6</sup>-N<sup>7</sup>-  
260 NH<sub>2</sub>) is buried in a potent polar binding pocket, which is highly conserved between the two NMUR  
261 subtypes. In contrast, distinct physiochemical environments surrounding a tripeptide (L<sup>2</sup>-F<sup>3</sup>-R<sup>4</sup>)  
262 between two NMUR subtypes serve as determinants for NMUR subtype preference. Specifically,  
263 substituting R<sup>4</sup> with a shorter or a weaker polar side chain may maintain the original polar  
264 interactions with NMUR2 relative to NMUR1, thus enhancing the NMUR2 selectivity. The side-  
265 chain substitution of F<sup>3</sup> displays a double-edged role in both NMUR1 and NMUR2 selectivity.  
266 Displacing the aromatic ring of F<sup>3</sup> with a smaller hydrophobic or a less aromatic side-chain improves  
267 NMUR2 selectivity. On the contrary, F<sup>3</sup> bearing a bulkier hydrophobic substituent enhances  
268 NMUR1 selectivity. Additionally, a peptide analog bearing bulky groups relative to L<sup>2</sup> may  
269 maximize its abundant space and avoid the steric hindrance, thus delivering a higher selectivity on  
270 NMUR1. Single or combined substitutions of L<sup>2</sup>-F<sup>3</sup>-R<sup>4</sup> side chains may provide novel drug  
271 candidates with NMUR subtype selectivity for anti-obesity therapy.

272

## 273 **Author Contributions**

274 C.Y. screened the expression constructs, optimized the NMURs-G<sub>q</sub> complexes, prepared the protein  
275 samples for final structure determination, participated in cryo-EM grid inspection, data collection,  
276 and model building; C.Y. and Y.Z designed the mutations and executed the functional studies; C.Y.,



277 P.X., and S.H. build and refine the structure models; W.Y. designed G<sub>q</sub> protein constructs; H.E.X.  
278 and Y.J. conceived and supervised the project; C.Y. and Y.J. prepared the figures and drafted  
279 manuscript; Y.J. wrote the manuscript with inputs from all authors.

280

281 **Competing Interests:** The authors declare no competing interests.

282

## 283 Reference

- 284 1. Howard, A.D. et al. Identification of receptors for neuromedin U and its role in feeding. *Nature*  
285 406, 70-4 (2000).
- 286 2. Hedrick, J.A. et al. Identification of a human gastrointestinal tract and immune system receptor  
287 for the peptide neuromedin U. *Mol Pharmacol* 58, 870-5 (2000).
- 288 3. Ida, T. et al. Neuromedin s is a novel anorexigenic hormone. *Endocrinology* 146, 4217-23  
289 (2005).
- 290 4. Novak, C.M. Neuromedin S and U. *Endocrinology* 150, 2985-7 (2009).
- 291 5. Aiyar, N. et al. Radioligand binding and functional characterization of recombinant human  
292 NmU1 and NmU2 receptors stably expressed in clonal human embryonic kidney-293 cells.  
293 *Pharmacology* 72, 33-41 (2004).
- 294 6. Martinez, V.G. & O'Driscoll, L. Neuromedin U: a multifunctional neuropeptide with pleiotropic  
295 roles. *Clin Chem* 61, 471-82 (2015).
- 296 7. Mori, K., Miyazato, M. & Kangawa, K. Neuromedin S: discovery and functions. *Results Probl*  
297 *Cell Differ* 46, 201-12 (2008).
- 298 8. Brighton, P.J., Szekeres, P.G., Wise, A. & Willars, G.B. Signaling and ligand binding by  
299 recombinant neuromedin U receptors: evidence for dual coupling to Galphaq/11 and Galphai  
300 and an irreversible ligand-receptor interaction. *Mol Pharmacol* 66, 1544-56 (2004).
- 301 9. Brighton, P.J., Szekeres, P.G. & Willars, G.B. Neuromedin U and its receptors: structure,  
302 function, and physiological roles. *Pharmacol Rev* 56, 231-48 (2004).
- 303 10. Benzon, C.R. et al. Neuromedin U receptor 2 knockdown in the paraventricular nucleus  
304 modifies behavioral responses to obesogenic high-fat food and leads to increased body weight.  
305 *Neuroscience* 258, 270-9 (2014).
- 306 11. Zhang, W. et al. Neuromedin U suppresses glucose-stimulated insulin secretion in pancreatic  
307 beta cells. *Biochem Biophys Res Commun* 493, 677-683 (2017).
- 308 12. Tanaka, A. et al. Transnasal Delivery of the Peptide Agonist Specific to Neuromedin-U Receptor  
309 2 to the Brain for the Treatment of Obesity. *Mol Pharm* 17, 32-39 (2020).
- 310 13. Nagai, H. et al. Differential effects of selective agonists of neuromedin U1 and U2 receptors in  
311 obese and diabetic mice. *Br J Pharmacol* 175, 359-373 (2018).
- 312 14. Kojima, M. et al. Purification and identification of neuromedin U as an endogenous ligand for  
313 an orphan receptor GPR66 (FM3). *Biochemical and biophysical research communications* 276,  
314 435-438 (2000).
- 315 15. Wan, Y. et al. Characterization of neuromedin U (NMU), neuromedin S (NMS) and their  
316 receptors (NMUR1, NMUR2) in chickens. *Peptides* 101, 69-81 (2018).
- 317 16. Minamino, N., Kangawa, K. & Matsuo, H. Neuromedin U-8 and U-25: novel uterus stimulating  
318 and hypertensive peptides identified in porcine spinal cord. *Biochem Biophys Res Commun*  
319 130, 1078-85 (1985).

- 320 17. Mori, K. et al. Identification of neuromedin S and its possible role in the mammalian circadian  
321 oscillator system. *EMBO J* 24, 325-35 (2005).
- 322 18. Takayama, K. et al. Discovery of selective hexapeptide agonists to human neuromedin U  
323 receptors types 1 and 2. *J Med Chem* 57, 6583-93 (2014).
- 324 19. Takayama, K. et al. Design and synthesis of peptidic partial agonists of human neuromedin U  
325 receptor 1 with enhanced serum stability. *Bioorg Med Chem Lett* 30, 127436 (2020).
- 326 20. Gajjar, S. & Patel, B.M. Neuromedin: An insight into its types, receptors and therapeutic  
327 opportunities. *Pharmacological Reports* 69, 438-447 (2017).
- 328 21. Takayama, K. et al. Discovery of a Human Neuromedin U Receptor 1-Selective Hexapeptide  
329 Agonist with Enhanced Serum Stability. *J Med Chem* 60, 5228-5234 (2017).
- 330 22. De Prins, A. et al. Synthesis and in Vitro Evaluation of Stabilized and Selective Neuromedin U-  
331 1 Receptor Agonists. *ACS Med Chem Lett* 9, 496-501 (2018).
- 332 23. Takayama, K. et al. Discovery of potent hexapeptide agonists to human neuromedin u receptor  
333 1 and identification of their serum metabolites. *ACS medicinal chemistry letters* 6, 302-307  
334 (2015).
- 335 24. Takayama, K., Taguchi, A., Yakushiji, F. & Hayashi, Y. Identification of a degrading enzyme in  
336 human serum that hydrolyzes a C-terminal core sequence of neuromedin U. *Peptide Science*  
337 106, 440-445 (2016).
- 338 25. Takayama, K. et al. A chemically stable peptide agonist to neuromedin U receptor type 2. *Bioorg*  
339 *Med Chem* 28, 115454 (2020).
- 340 26. Chun, E. et al. Fusion partner toolchest for the stabilization and crystallization of G protein-  
341 coupled receptors. *Structure* 20, 967-76 (2012).
- 342 27. Xu, P. et al. Structures of the human dopamine D3 receptor-Gi complexes. *Mol Cell* 81, 1147-  
343 1159 e4 (2021).
- 344 28. Zhuang, Y. et al. Structural insights into the human D1 and D2 dopamine receptor signaling  
345 complexes. *Cell* 184, 931-942. e18 (2021).
- 346 29. Duan, J. et al. Cryo-EM structure of an activated VIP1 receptor-G protein complex revealed by  
347 a NanoBiT tethering strategy. *Nat Commun* 11, 4121 (2020).
- 348 30. Kim, K. et al. Structure of a Hallucinogen-Activated Gq-Coupled 5-HT<sub>2A</sub> Serotonin Receptor.  
349 *Cell* 182, 1574-1588.e19 (2020).
- 350 31. Wang, Y. et al. Molecular recognition of an acyl-peptide hormone and activation of ghrelin  
351 receptor. *bioRxiv*, 2021.06.09.447478 (2021).
- 352 32. Yin, Y.-L. et al. Molecular basis for kinin selectivity and activation of the human bradykinin  
353 receptors. *bioRxiv* (2021).
- 354 33. Grisshammer, R. The quest for high-resolution G protein-coupled receptor-G protein structures.  
355 *Proc Natl Acad Sci U S A* 117, 6971-6973 (2020).
- 356 34. Chan, P., Thomas, C.J., Sprang, S.R. & Tall, G.G. Molecular chaperoning function of Ric-8 is  
357 to fold nascent heterotrimeric G protein  $\alpha$  subunits. *Proceedings of the National Academy of*  
358 *Sciences* 110, 3794-3799 (2013).
- 359 35. Srivastava, D., Gakhar, L. & Artyemyev, N.O. Structural underpinnings of Ric8A function as a  
360 G-protein  $\alpha$ -subunit chaperone and guanine-nucleotide exchange factor. *Nature*  
361 *communications* 10, 1-14 (2019).
- 362 36. Nehmé, R. et al. Mini-G proteins: Novel tools for studying GPCRs in their active conformation.  
363 *PloS one* 12, e0175642 (2017).

- 364 37. Xu, P. et al. Structural insights into the lipid and ligand regulation of serotonin receptors. *Nature*  
365 592, 469-473 (2021).
- 366 38. Huang, S. et al. Structural basis for recognition of anti-migraine drug lasmiditan by the serotonin  
367 receptor 5-HT<sub>1F</sub>-G protein complex. *bioRxiv* (2021).
- 368 39. Gardiner, S.M., Compton, A.M., Bennett, T., Domin, J. & Bloom, S.R. Regional hemodynamic  
369 effects of neuromedin U in conscious rats. *Am J Physiol* 258, R32-8 (1990).
- 370 40. Okimura, K., Sakura, N., Ohta, S., Kurosawa, K. & Hashimoto, T. Contractile activity of porcine  
371 neuromedin U-25 and various neuromedin U-related peptide fragments on isolated chicken crop  
372 smooth muscle. *Chemical and Pharmaceutical Bulletin* 40, 1500-1503 (1992).
- 373 41. Asada, H. et al. The Crystal Structure of Angiotensin II Type 2 Receptor with Endogenous  
374 Peptide Hormone. *Structure* 28, 418-425 e4 (2020).
- 375 42. Kato, H.E. et al. Conformational transitions of a neurotensin receptor 1-Gi1 complex. *Nature*  
376 572, 80-85 (2019).
- 377 43. Zhuang, Y. et al. Structure of formylpeptide receptor 2-G<sub>i</sub> complex reveals insights into ligand  
378 recognition and signaling. *Nature communications* 11, 1-12 (2020).
- 379 44. Przygodzka, P., Soboska, K., Sochacka, E. & Boncela, J. Neuromedin U: A Small Peptide in the  
380 Big World of Cancer. *Cancers (Basel)* 11(2019).
- 381 45. Weis, W.I. & Kobilka, B.K. The Molecular Basis of G Protein-Coupled Receptor Activation.  
382 *Annu Rev Biochem* 87, 897-919 (2018).
- 383 46. Trzaskowski, B. et al. Action of molecular switches in GPCRs--theoretical and experimental  
384 studies. *Curr Med Chem* 19, 1090-109 (2012).
- 385 47. Deluigi, M. et al. Complexes of the neurotensin receptor 1 with small-molecule ligands reveal  
386 structural determinants of full, partial, and inverse agonism. *Sci Adv* 7(2021).
- 387 48. Liu, Q. et al. Structural basis for ligand recognition and G protein-coupling promiscuity of the  
388 cholecystokinin A receptor. *bioRxiv*, 2021.05.09.443337 (2021).
- 389 49. Xia, R. et al. Cryo-EM structure of the human histamine H1 receptor/Gq complex. *Nat Commun*  
390 12, 2086 (2021).
- 391 50. Maeda, S., Qu, Q., Robertson, M.J., Skiniotis, G. & Kobilka, B.K. Structures of the M1 and M2  
392 muscarinic acetylcholine receptor/G-protein complexes. *Science* 364, 552-557 (2019).
- 393 51. Flock, T. et al. Universal allosteric mechanism for G $\alpha$  activation by GPCRs. *Nature* 524, 173-  
394 179 (2015).
- 395 52. Minamino, N., Sudoh, T., Kangawa, K. & Matsuo, H. Neuromedins: novel smooth-muscle  
396 stimulating peptides identified in porcine spinal cord. *Peptides* 6 Suppl 3, 245-8 (1985).
- 397 53. Maeda, S. et al. Development of an antibody fragment that stabilizes GPCR/G-protein  
398 complexes. *Nature communications* 9, 1-9 (2018).
- 399 54. Zheng, S.Q. et al. MotionCor2: anisotropic correction of beam-induced motion for improved  
400 cryo-electron microscopy. *Nat Methods* 14, 331-332 (2017).
- 401 55. Zhang, K. Gctf: Real-time CTF determination and correction. *Journal of structural biology* 193,  
402 1-12 (2016).
- 403 56. Scheres, S.H. RELION: implementation of a Bayesian approach to cryo-EM structure  
404 determination. *J Struct Biol* 180, 519-30 (2012).
- 405 57. Pettersen, E.F. et al. UCSF Chimera--a visualization system for exploratory research and  
406 analysis. *J Comput Chem* 25, 1605-12 (2004).
- 407 58. Emsley, P. & Cowtan, K. Coot: model-building tools for molecular graphics. *Acta Crystallogr*

- 408 D Biol Crystallogr 60, 2126-32 (2004).  
409 59. Croll, T.I. ISOLDE: a physically realistic environment for model building into low-resolution  
410 electron-density maps. Acta Crystallogr D Struct Biol 74, 519-530 (2018).  
411 60. Adams, P.D. et al. PHENIX: a comprehensive Python-based system for macromolecular  
412 structure solution. Acta Crystallographica Section D: Biological Crystallography 66, 213-221  
413 (2010).  
414 61. Pettersen, E.F. et al. UCSF ChimeraX: Structure visualization for researchers, educators, and  
415 developers. Protein Science 30, 70-82 (2021).  
416 62. Garbison, K.E., Heinz, B.A. & Lajiness, M.E. IP-3/IP-1 Assays. Assay Guidance Manual  
417 [Internet] (2012).  
418 63. Sondergaard, C.R., Olsson, M.H., Rostkowski, M. & Jensen, J.H. Improved Treatment of  
419 Ligands and Coupling Effects in Empirical Calculation and Rationalization of pKa Values. J  
420 Chem Theory Comput 7, 2284-95 (2011).

421

422

## 423 **Method**

### 424 **Constructs**

425 The full-length human NMUR1 and NMUR2 were modified to contain the N-terminal thermally  
426 stabilized BRIL<sup>26</sup> to enhance receptor expression and the addition of affinity tags, including an N-  
427 terminal Flag tag and a 10×His-tag. LgBiT was inserted at the C-terminus of the human NMUR1  
428 using homologous recombination. Both modified NMUR1 and NMUR2 were cloned into the  
429 pFastBac (Thermo Fisher Scientific) vectors using the ClonExpress II One Step Cloning Kit  
430 (Vazyme Biotech). An engineered G $\alpha_q$  chimera was generated based on the mini-G $\alpha_s$  scaffold with  
431 its N-terminus replaced by corresponding sequences of G $\alpha_{i1}$ , designated as mG $\alpha_{s/q/iN}$ . Human wild-  
432 type (WT) G $\beta_1$ , human G $\gamma_2$ , and a single-chain antibody scFv16<sup>53</sup>, as well as a G $\beta_1$  fused with  
433 SmBiT at its C-terminus, were cloned into pFastBac vectors.

434

### 435 **Insect cell expression**

436 Human NMUR1, NMUR2, G $_q$  chimera, G $\beta_1$ , G $\gamma$ , scFv16, and Ric8a were co-expressed in High  
437 Five insect cells (Invitrogen) using the baculovirus method (Expression Systems). Cell cultures were  
438 grown in ESF 921 serum-free medium (Expression Systems) to a density of 2-3 million cells per  
439 mL and then infected with six separate baculoviruses at a suitable ratio. The culture was collected  
440 by centrifugation 48 h after infection, and cell pellets were stored at -80°C.

441

### 442 **Complex purification**

443 Cell pellets were thawed in 20 mM HEPES pH 7.4, 50 mM NaCl, 10 mM MgCl<sub>2</sub>, and CaCl<sub>2</sub>  
444 supplemented with Protease Inhibitor Cocktail (TargetMol). For the NMU-NMUR1/2-G $_q$ -scFv16  
445 complexes, 10  $\mu$ M NMU (GenScript) and 25 mU ml<sup>-1</sup> apyrase (Sigma) were added. For the NMS-  
446 NMUR1/2-G $_q$ -scFv16 complexes, 5  $\mu$ M NMS (GenScript) and 25 mU ml<sup>-1</sup> apyrase (Sigma) were  
447 added. The suspension was incubated for 1 h at room temperature, and the complex was solubilized

448 from the membrane using 0.5% (w/v) lauryl maltose neopentylglycol (LMNG) (Anatrace) and 0.1%  
449 (w/v) cholesteryl hemisuccinate (CHS) (Anatrace) for 2 h at 4°C. Insoluble material was removed  
450 by centrifugation at 65,000 g for 35 min, and the the supernatant was purified by nickel affinity  
451 chromatography (Ni Smart Beads 6FF, SMART Lifesciences). The resin was then packed and  
452 washed with 20 column volumes of 20 mM HEPES pH 7.4, 50 mM NaCl, 0.01% (w/v) LMNG, and  
453 0.002% CHS. The complex sample was eluted in buffer containing 300 mM imidazole and  
454 concentrated using an Amicon Ultra Centrifugal Filter (MWCO 100 kDa). The complex was then  
455 subjected to size-exclusion chromatography on a Superdex 200 Increase 10/300 column (GE  
456 Healthcare) pre-equilibrated with size buffer containing 20 mM HEPES pH 7.4, 100 mM NaCl,  
457 0.00075% (w/v) LMNG, 0.00025% (w/v) GDN (Anatrace) and 0.00015% CHS to separate  
458 complexes. For the NMU-bound or NMS-bound complexes, 10  $\mu$ M NMU and 5  $\mu$ M NMS were  
459 included in the Size Buffer, respectively. Eluted fractions were evaluated by SDS-PAGE and those  
460 consisting of receptor-G<sub>q</sub> protein complex were pooled and concentrated for cryo-EM experiments.  
461

#### 462 **Cryo-EM grid preparation and data acquisition**

463 Three microliters of the purified NMUR1 and NMUR2 complexes at around 18 mg ml<sup>-1</sup>, 15 mg ml<sup>-1</sup>,  
464 1, 20 mg ml<sup>-1</sup>, and 15 mg ml<sup>-1</sup> for NMU-NMUR1, NMS-NMUR1, NMU-NMUR2, and NMS-  
465 NMUR2 complexes, respectively, were applied onto a glow-discharged Quantifoil R1.2/1.3 200-  
466 mesh gold holey carbon grid. The grids were blotted for 3 s under 100% humidity at 4°C and then  
467 vitrified by plunging into liquid ethane using a Vitrobot Mark IV (Thermo Fisher Scientific). For all  
468 NMURs complexes, Cryo-EM data collection was performed on a Titan Krios G3i at a 300 kV  
469 accelerating voltage at the Shuimu BioSciences Ltd (Beijing, China) and the micrographs were  
470 recorded using a super-resolution counting mode at a pixel size of 0.54 Å. Micrographs were  
471 obtained at a dose rate of about 18.5 e<sup>-</sup> Å<sup>-2</sup> s<sup>-1</sup> with a defocus ranging from -1.0 to -3.0  $\mu$ m. Each  
472 micrograph was dose-fractionated to 32 frames with a total exposure time of 3.33 s. A total of 3746,  
473 3424, 2993, and 2862 movies were collected for NMU-NMUR1, NMS-NMUR1, NMU-NMUR2,  
474 and NMS-NMUR2 complexes, respectively.  
475

475

#### 476 **Image processing and 3D reconstruction**

477 Image stacks were subjected to beam-induced motion correction using MotionCor2.1<sup>54</sup>. Contrast  
478 transfer function (CTF) parameters for each-non-dose-weighted micrograph were determined by  
479 Gctf<sup>55</sup>. Automated particle selection and data processing were performed using RELION-3.0 beta2  
480<sup>56</sup>. For the dataset of the NMS-NMUR2-G<sub>q</sub> complex, particles selection yielded 5,191,427 particles,  
481 which were subjected to reference-free 2D classification. The map of the 5-HT<sub>1E</sub>-G<sub>i</sub> complex (EMD-  
482 30975) low-pass-filtered to 30 Å was used as an initial reference model for 3D classification. A  
483 further two rounds of 3D classifications focusing the alignment on the complex, except AHD of the  
484 G $\alpha$  subunit, produced one high-quality subset accounting for 728,263 particles. These particles were  
485 subsequently subjected to Bayesian polishing, CTF refinement, and 3D refinement, which generated

486 a map with an indicated global resolution of 3.2 Å at a Fourier shell correlation (FSC) of 0.143.  
487 Local resolution was determined using the Resmap package with half map as input maps.

488

489 For the dataset of NMU-NMUR2-G<sub>q</sub> complex, particles selection yielded 4,738,667 particles, which  
490 were subjected to reference-free 2D classification. The map of the NMS-NMUR2-G<sub>q</sub> complex low-  
491 pass-filtered to 60 Å was used as an initial reference model for 3D classification. A further two  
492 rounds of 3D classifications focusing the alignment on the complex, except AHD of the G<sub>α</sub>,  
493 produced three high-quality subsets accounting for 2,087,642 particles. These particles were  
494 subsequently subjected to Bayesian polishing, CTF refinement, and 3D refinement, which generated  
495 a map with an indicated global resolution of 2.8 Å at an FSC of 0.143.

496

497 For the dataset of the NMU-NMUR1-G<sub>q</sub> complex, automated particle selection yielded 5,129,300  
498 particles. The particles were extracted on a binned dataset with a pixel size of 1.08 Å and were  
499 subjected to a reference-free 2D classification. The map of the NMS-NMUR2-G<sub>q</sub> complex solved  
500 in this study was used as an initial reference model for 3D classification. Further 3D classifications  
501 focusing the alignment on the complex, except the α helical domain of the G<sub>α</sub>, produced the high-  
502 quality subset accounting for 312,310 particles. These particles were subsequently subjected to  
503 Bayesian polishing, CTF refinement, and 3D refinement, which generated a map with an indicated  
504 global resolution of 3.2 Å at an FSC of 0.143.

505

506 For the dataset of the NMS-NMUR1-G<sub>q</sub> complex, particles selection yielded 4,708,785 particles,  
507 which were subjected to reference-free 2D classification. The map of NMU-NMUR1-G<sub>q</sub> complex  
508 low-pass-filtered to 60 Å was used as an initial reference model for 3D classification. A further two  
509 rounds of 3D classifications focusing the alignment on the complex, except AHD of the G<sub>α</sub> subunit,  
510 produced one high-quality subset accounting for 588,662 particles. These particles were  
511 subsequently subjected to Bayesian polishing, CTF refinement, and 3D refinement, which generated  
512 a map with an indicated global resolution of 2.9 Å at an FSC of 0.143.

513

#### 514 **Structure determination and refinement**

515 The cryo-EM structure of the NMS-NMUR2-G<sub>q</sub> complex was solved using 5-HT<sub>1E</sub> as the initial  
516 model (PDB 7E33). All other three structures of NMURs-G<sub>q</sub> complexes were built using the NMS-  
517 NMUR2-G<sub>q</sub> model as a template. The models were docked into cryo-EM density maps using  
518 Chimera <sup>57</sup>, followed by iterative manual adjustment and rebuilding in Coot <sup>58</sup> and ISOLDE <sup>59</sup>,  
519 against the cryo-EM electron density maps. Realspace and reciprocal refinements were performed  
520 using PHENIX <sup>60</sup>, as well as the model statistics validation. Structural figures were prepared in  
521 Chimera <sup>57</sup>, ChimeraX <sup>61</sup>, and PyMOL (<https://pymol.org/2/>). The final refinement statistics are  
522 provided in Supplementary Table 1.

523

524 **Inositol phosphate accumulation assay**

525 IP-One production was measured using the IP-One HTRF kit (Cisbio)<sup>62</sup>. Briefly, AD293 cells  
526 (Agilent) were grown to a density of 400,000-500,000 cells per mL and then infected with separate  
527 plasmids at a suitable concentration. The culture was collected by centrifugation 24 h after  
528 incubation at 37°C in 5% CO<sub>2</sub> with a Stimulation Buffer. The cell suspension was then dispensed in  
529 a white 384-well plate at a volume of 7 µl per well before adding 7 µl of ligands. The mixture was  
530 incubated for 1 h at 37°C. IP-One-d2 and anti-IP-One Cryptate dissolved in Lysis Buffer (3 µl each)  
531 were subsequently added and incubated for 15-30 min at room temperature before measurement.  
532 Intracellular IP-One measurement was carried with the IP-One HTRF kit and EnVision multi-plate  
533 reader (PerkinElmer) according to the manufacturer's instructions. Data were normalized to the  
534 baseline response of the ligand.

535

536 **Molecular docking**

537 Non-standard residues were generated by Discovery Studio 2016 in the Sketch Molecules panel by  
538 editing the origin residues correspondingly. Then, the structures encountered a minimization process  
539 in Schrödinger Maestro, Protein Preparation Wizard panel. In particular, hydrogens were firstly  
540 added to the structure. Then, the protonation state of each residue was assigned with the help of  
541 Propka<sup>63</sup>. Finally, the OPLS3 force field was applied to minimize the energy of the structures with  
542 a restrain of heavy atoms to converge them to a root mean square deviation of 0.3 Å.

543

544 **Data availability**

545 The atomic coordinates and the electron microscopy maps have been deposited in the Protein Data  
546 Bank (PDB) under accession number xxxx, xxxx, xxxx, and xxxx, as well as Electron Microscopy  
547 Data Bank (EMDB) accession number xxxx, xxxx, xxxx, and xxxx for the NMU-NMUR1-G<sub>q</sub>-  
548 scFv16, NMU-NMUR2-G<sub>q</sub>-scFv16, NMS-NMUR1-G<sub>q</sub>-scFv16, and NMS-NMUR2-G<sub>q</sub>-scFv16  
549 complexes, respectively. Source data are provided with this paper.

550

551 **Statistics**

552 All functional study data were analyzed using GraphPad Prism 8.0 (Graphpad Software Inc.) and  
553 showed as means ± S.E.M. from at least three independent experiments in triplicate. The  
554 significance was determined with two-side, one-way ANOVA with Tukey's test, and  $P < 0.05$  was  
555 considered statistically significant.

556

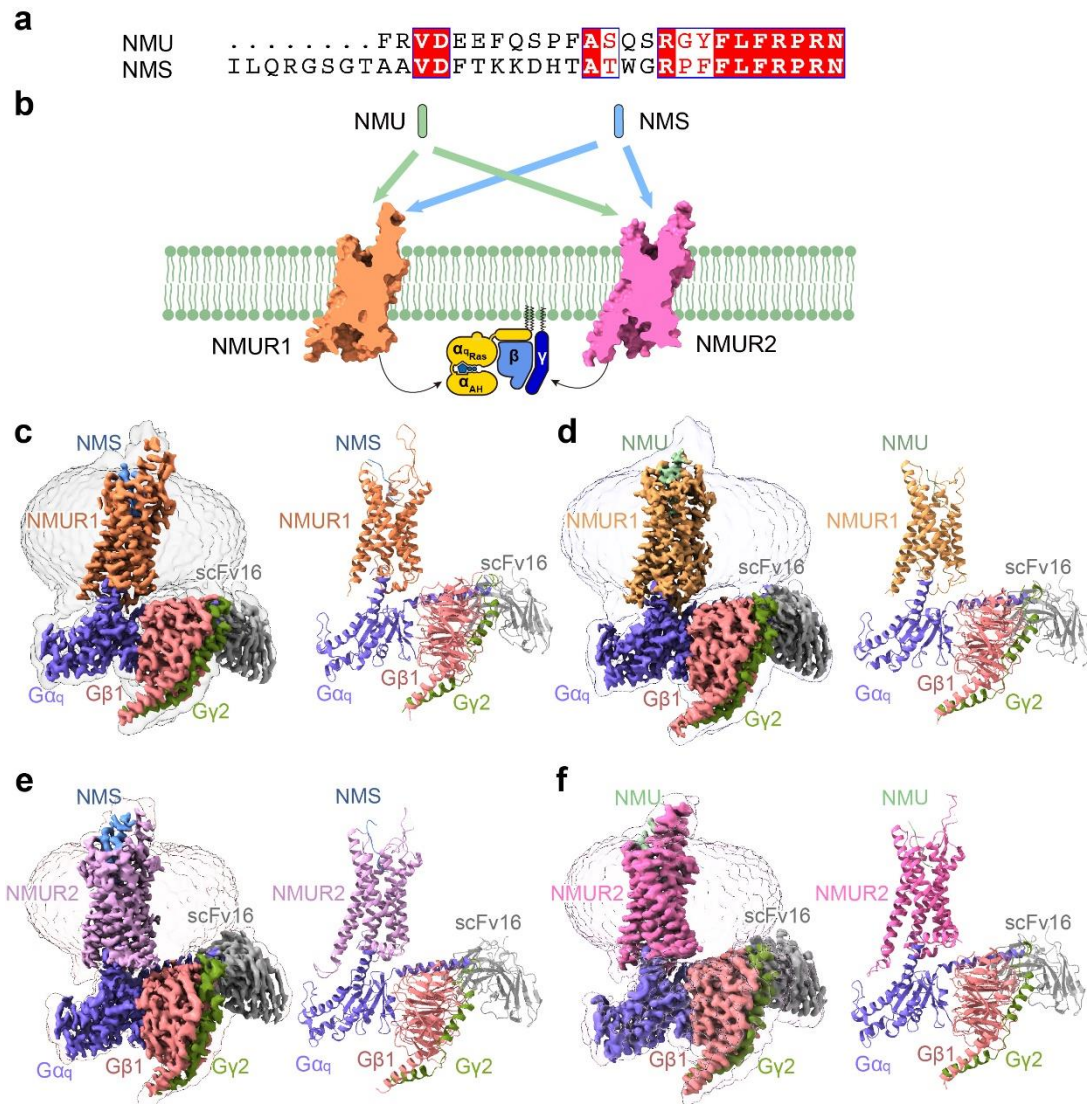

557

558

559 **Fig. 1 Overall structures of G<sub>q</sub>-coupled NMUR1/2 complexes bound to NMU and NMS. a**

560 Sequence alignment of NMU and NMS created by CLUSTALW ([https://www.genome.jp/tools-](https://www.genome.jp/tools-bin/clustalw)

561 [bin/clustalw](https://www.genome.jp/tools-bin/clustalw)) and ESPript 3.0 (<https://espript.ibcp.fr/ESPript/cgi-bin/ESPript.cgi>).

562 **b** Schematic illustration of peptide-binding and G<sub>q</sub> protein-coupling of NMURs.

563 **c-f** Orthogonal views of the density maps and models of NMU-NMUR1-G<sub>q</sub>-scFv16 (**c**), NMS-NMUR1-G<sub>q</sub>-scFv16 (**d**), NMU-

564 NMUR2-G<sub>q</sub>-scFv16 (**e**), and NMS-NMUR2-G<sub>q</sub>-scFv16 (**f**) complexes. NMS is shown in light blue,

565 NMS-bound NMUR1 in orange, and NMS-bound NMUR2 in plum. NMU is displayed in green,

566 NMU-bound NMUR1 in brown, and NMU-bound NMUR2 in hot pink. The G<sub>q</sub> heterotrimer is

567 colored by subunits. G<sub>αq</sub>, purple; G<sub>β1</sub>, salmon; G<sub>γ2</sub>, dark green; scFv16, grey. G<sub>αq</sub> refers to

568 mG<sub>αs/q/iN</sub>.

569

570

571



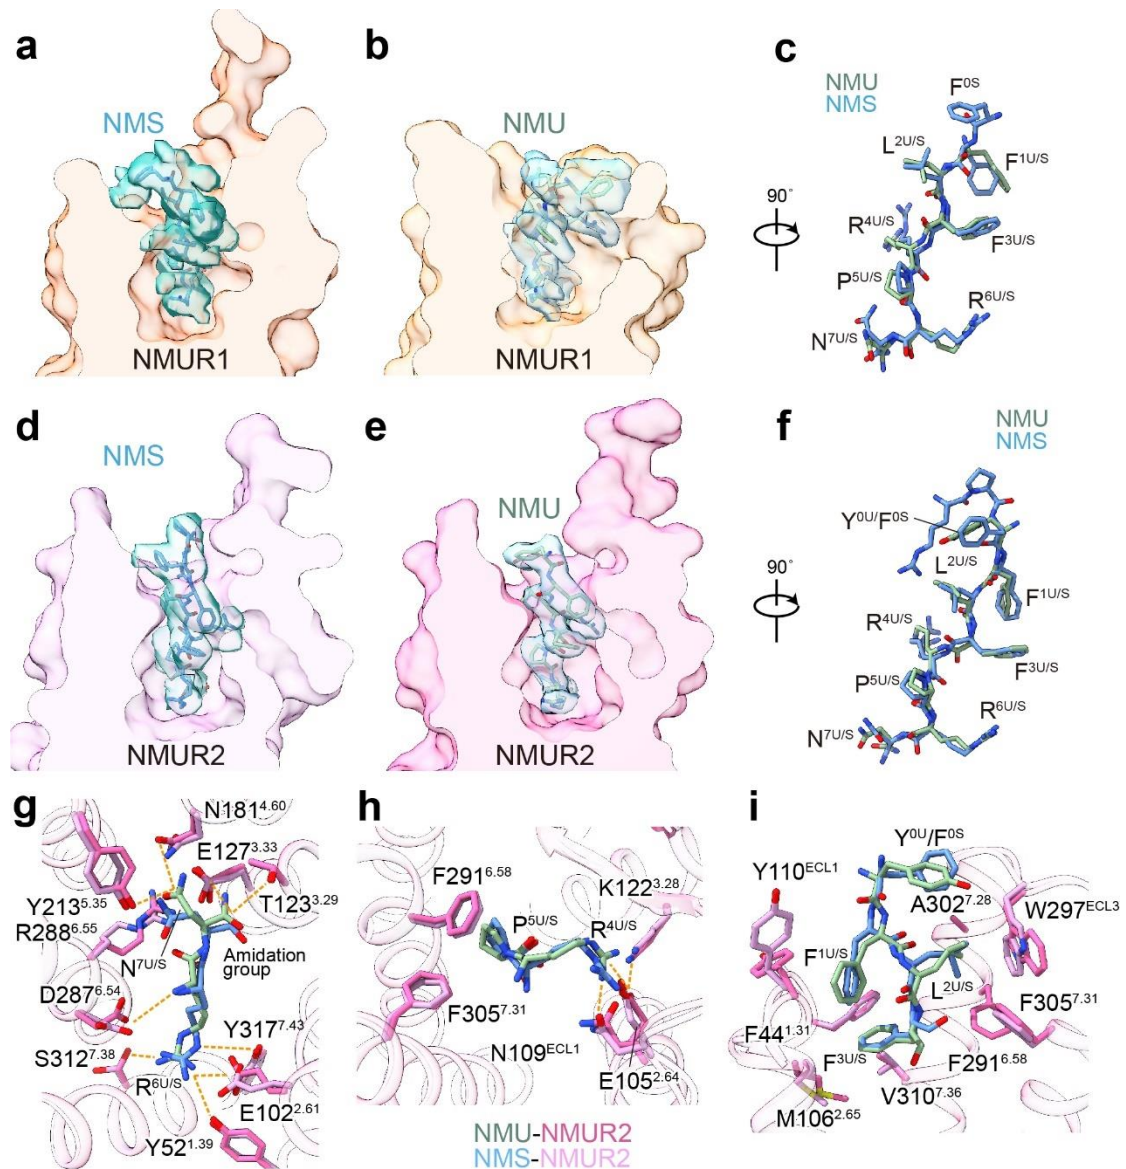

572

573

574 **Fig. 2 The conserved binding pocket of NMUR2.** a-c Cut-away view of NMU/NMS binding  
 575 pocket of NMUR1 (a, b) and structural superposition of NMU and NMS in NMUR1 (c). d-f Cut-  
 576 away view of NMU/NMS binding pocket of NMUR2 (d, e) and structural superposition of NMU  
 577 and NMS in NMUR1 (f). The density of NMS is colored in dark green, while the density of NMU  
 578 is colored in blue. g-i Detailed interaction of NMU/NMS with residues in NMUR2. The binding site  
 579 of N<sup>7U/S</sup> and R<sup>6U/S</sup> (g), P<sup>5U/S</sup> and R<sup>4U/S</sup> (h), F<sup>3U/S</sup>, L<sup>2U/S</sup>, F<sup>1U/S</sup>, and Y<sup>0U</sup>/F<sup>0U</sup> (i) are shown. Hydrogen  
 580 bonds and salt bridges are depicted as orange dashed lines. NMU and NMS are shown as sticks.  
 581 NMS is shown in light blue and NMS-bound NMUR2 in plum. NMU is displayed in green and  
 582 NMU-bound NMUR2 in hot pink.

583

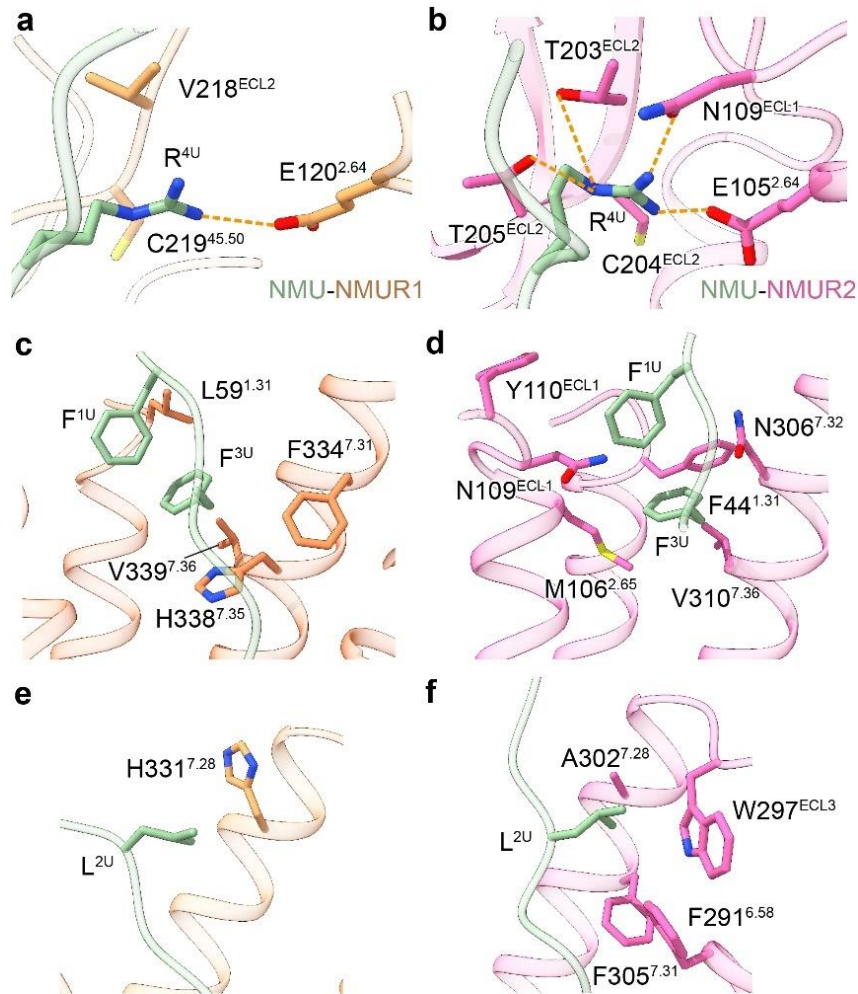

584

585

586 **Fig.3 Comparison of the binding mode L<sup>2</sup>-F<sup>3</sup>-R<sup>4</sup> in NMU between NMUR1 and NMUR2.**

587 Detailed interactions between R<sup>4U</sup> (**a, b**), F<sup>3U</sup> (**c, d**), and L<sup>2U</sup> (**e, f**) and pocket residues in NMUR1

588 and NMUR2 are shown. Side chains of residues are displayed in sticks. Hydrogen bonds and salt

589 bridges are depicted as orange dashed lines. NMU is displayed in green, NMUR1 in brown, and

590 NMUR2 in hot pink.

591

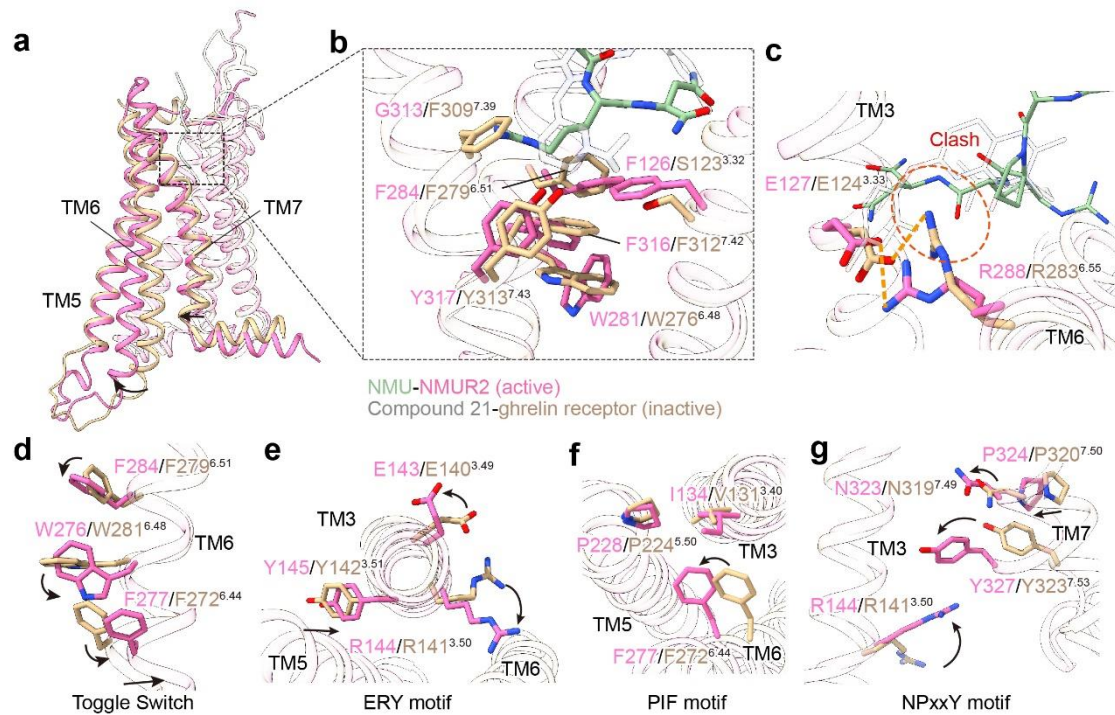

592

593

594 **Fig. 4 Activation mechanism of NMURs.** **a** Structural superposition of active NMUR2 and  
595 antagonist-bound ghrelin receptor (PDB 6KO5) from the side view. The movement directions of  
596 TMs in NMUR2 relative to the ghrelin receptor are highlighted as black arrows. NMUR2 and  
597 ghrelin receptors are colored in hot pink and wheat, respectively. **b** Interactions between NMU and  
598 residues located at the bottom of peptide binding pocket. **c** Comparison of interaction between  
599 peptide and R<sup>6.55</sup>. The possible clash is highlighted by a red dashed circle. Hydrogen bonds and salt  
600 bridges are depicted as orange dashed lines. Compound 21, the antagonist of ghrelin receptor, and  
601 NMU are colored in grey and green, respectively. **d-g** Conformational changes of the conserved  
602 “micro-switches” upon receptor activation, including Toggle switch (**d**), ERY (**e**), PIF (**f**), and  
603 NPxxY (**g**) motifs. The conformational changes of residue side chains are shown as black arrows  
604 upon NMUR2 activation in contrast to the antagonist-bound ghrelin receptor.

605

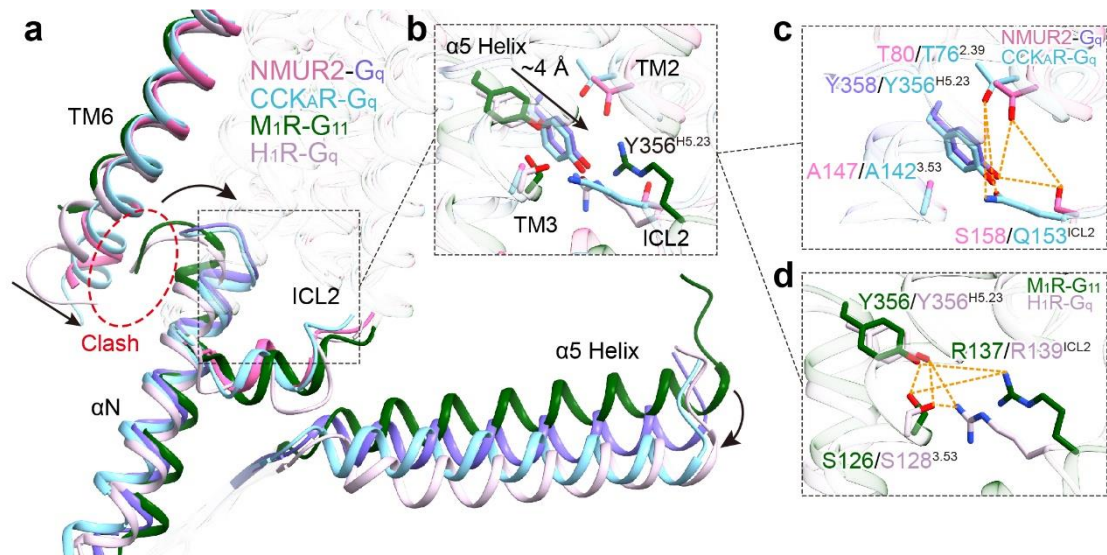

606

607

608 **Fig. 5 G<sub>q</sub> protein-coupling of NMUR2.** **a** An overall conformational comparison of G<sub>q</sub>-coupled  
609 NMUR2 with G<sub>q</sub>-coupled CCK<sub>A</sub>R (PDB 7EZM), H<sub>1</sub>R (PDB 7DFL), and G<sub>11</sub>-couple M<sub>1</sub>R (PDB  
610 6OIJ). TM6 and ICL2 of receptors, as well as  $\alpha$ N and  $\alpha$ 5 helix of G proteins, are highlighted. The  
611 potential clashes between TM6 of receptors and  $\alpha$ 5 helices of G $\alpha_{q/11}$  subunits are highlighted by  
612 dashed circles. **b-d** Interactions between Y<sup>H5.23</sup> of G $\alpha_{q/11}$   $\alpha$ 5 helices and receptors, including  
613 NMUR2, M<sub>1</sub>R, CCK<sub>A</sub>R, and H<sub>1</sub>R. The detailed polar interactions between Y<sup>H5.23</sup> and NMUR2 and  
614 CCK<sub>A</sub>R (**c**), as well as M<sub>1</sub>R and H<sub>1</sub>R (**d**) are shown. The polar interactions are shown by orange  
615 dashed lines. The displacements of components in G<sub>q</sub>-coupled NMUR2 and CCK<sub>A</sub>R relative to  
616 G<sub>q/11</sub>-coupled M<sub>1</sub>R and H<sub>1</sub>R are indicated by black arrows. Colors are shown as indicated. G<sub>q</sub>  
617 refers to G<sub>q</sub> chimeras used in structural studies of the four GPCRs. G<sub>q</sub> coupled by NMUR2 refers  
618 to mG<sub>s/q/iN</sub>.
